# Supplementary material for: Agronomical and Physiological Responses of Faba Bean Genotypes to Salt Stress
Source: MDPI journal article supplement (doi:10.3390/agriculture12020235), 2022-02-07
Supplement: s1 [file s1]

**Table S1.** Mean average trait values of all the faba bean genotypes.

|                 | PH    | LA    | SPAD  | SC     | LT    | DF    | FW   | DW   | NOP   | NOS    | SW    | Na     | K      | Na/K | TChL  |
|-----------------|-------|-------|-------|--------|-------|-------|------|------|-------|--------|-------|--------|--------|------|-------|
| Hassawi-1-C     | 40.00 | 22.38 | 31.93 | 363.20 | 30.33 | 45.67 | 0.50 | 0.06 | 60.00 | 127.00 | 44.82 | 8.00   | 23.20  | 0.34 | 34.13 |
| Hassawi-2-C     | 36.00 | 14.98 | 40.10 | 526.34 | 29.33 | 42.67 | 0.39 | 0.06 | 33.67 | 92.33  | 45.32 | 14.70  | 126.00 | 0.12 | 33.46 |
| Hssawi-3-C      | 34.00 | 10.33 | 35.40 | 347.67 | 29.33 | 47.33 | 0.25 | 0.02 | 49.00 | 121.33 | 39.33 | 8.30   | 42.80  | 0.19 | 33.50 |
| Triple white-C  | 29.00 | 19.06 | 34.10 | 347.67 | 28.33 | 47.00 | 0.45 | 0.04 | 46.33 | 99.00  | 33.73 | 14.50  | 34.50  | 0.42 | 35.82 |
| ILB-4347-C      | 32.00 | 14.29 | 36.67 | 439.20 | 30.20 | 49.00 | 0.42 | 0.03 | 36.00 | 69.33  | 27.72 | 14.60  | 75.00  | 0.19 | 30.52 |
| Sakha-C         | 32.00 | 23.39 | 31.63 | 492.89 | 30.67 | 44.00 | 0.58 | 0.09 | 32.33 | 102.33 | 70.52 | 18.40  | 60.20  | 0.31 | 30.66 |
| Misr-3-C        | 23.00 | 19.31 | 38.90 | 617.00 | 31.13 | 47.33 | 0.42 | 0.14 | 28.33 | 68.67  | 31.56 | 12.30  | 44.90  | 0.27 | 32.52 |
| FLIP12501FB-C   | 31.67 | 31.74 | 35.23 | 537.78 | 31.67 | 48.00 | 0.75 | 0.06 | 30.33 | 75.00  | 39.00 | 9.60   | 54.00  | 0.18 | 35.00 |
| Sakha-1_C       | 33.00 | 14.85 | 31.20 | 415.44 | 31.93 | 50.00 | 0.44 | 0.03 | 30.33 | 78.00  | 33.54 | 9.40   | 59.30  | 0.16 | 31.85 |
| Gazira-C        | 44.00 | 12.51 | 20.93 | 346.79 | 31.83 | 39.33 | 0.38 | 0.03 | 68.67 | 186.67 | 73.39 | 7.60   | 39.30  | 0.19 | 34.05 |
| FLIP12504FB-C   | 34.33 | 24.24 | 36.13 | 442.72 | 30.00 | 47.33 | 0.65 | 0.02 | 44.00 | 94.67  | 24.51 | 15.20  | 30.40  | 0.50 | 36.25 |
| FLIP12505FB-C   | 33.33 | 16.20 | 40.07 | 330.06 | 29.00 | 47.33 | 0.55 | 0.05 | 23.00 | 54.00  | 13.50 | 8.60   | 13.30  | 0.65 | 30.51 |
| Hassawi-1-S1    | 35.33 | 14.63 | 34.53 | 361.99 | 32.67 | 39.67 | 0.33 | 0.03 | 18.00 | 64.33  | 40.34 | 50.80  | 59.90  | 0.85 | 35.74 |
| Hassawi-2-S1    | 34.00 | 19.98 | 22.07 | 246.36 | 32.23 | 39.67 | 0.69 | 0.08 | 18.67 | 39.00  | 28.12 | 47.60  | 48.80  | 0.98 | 42.22 |
| Hssawi-3-S1     | 30.00 | 17.35 | 24.57 | 334.42 | 32.80 | 40.33 | 0.55 | 0.05 | 25.33 | 56.67  | 26.70 | 51.40  | 148.00 | 0.35 | 40.76 |
| Triple white-S1 | 29.33 | 14.70 | 38.30 | 438.20 | 32.87 | 41.00 | 0.48 | 0.05 | 22.67 | 46.00  | 25.50 | 75.20  | 69.40  | 1.08 | 18.96 |
| ILB-4347-S1     | 29.67 | 13.95 | 29.40 | 580.78 | 32.50 | 41.67 | 0.44 | 0.03 | 20.33 | 47.67  | 24.18 | 36.70  | 24.80  | 1.48 | 25.71 |
| Sakha-S1        | 27.00 | 15.51 | 34.20 | 529.41 | 32.67 | 39.33 | 0.60 | 0.06 | 11.00 | 34.33  | 20.12 | 27.70  | 42.40  | 0.65 | 40.30 |
| Misr-3-S1       | 33.33 | 11.40 | 25.37 | 554.57 | 31.67 | 40.67 | 0.40 | 0.03 | 25.33 | 35.67  | 21.33 | 41.60  | 31.40  | 1.32 | 21.88 |
| FLIP12501FB-S1  | 32.00 | 20.01 | 28.37 | 481.02 | 33.00 | 43.00 | 0.60 | 0.07 | 16.33 | 41.67  | 28.57 | 92.10  | 103.00 | 0.89 | 18.55 |
| Sakha-1-S1      | 47.00 | 18.40 | 24.97 | 371.59 | 31.33 | 45.00 | 0.55 | 0.07 | 21.33 | 21.33  | 17.52 | 95.20  | 76.10  | 1.25 | 19.26 |
| Gazira-S1       | 25.00 | 14.89 | 28.30 | 310.19 | 32.17 | 45.00 | 0.53 | 0.05 | 25.33 | 33.67  | 36.11 | 41.60  | 30.60  | 1.36 | 51.13 |
| FLIP12504FB-S1  | 30.67 | 17.04 | 36.90 | 396.00 | 32.33 | 44.33 | 0.66 | 0.04 | 31.33 | 63.00  | 18.63 | 48.80  | 58.20  | 0.84 | 48.96 |
| FLIP12505FB-S1  | 24.00 | 19.47 | 28.07 | 295.23 | 31.33 | 46.67 | 0.52 | 0.05 | 28.67 | 62.00  | 9.05  | 45.50  | 70.60  | 0.64 | 30.34 |
| Hassawi-1-S2    | 24.67 | 15.54 | 38.93 | 321.21 | 32.67 | 37.00 | 0.56 | 0.13 | 15.33 | 39.33  | 9.04  | 50.20  | 31.00  | 1.62 | 21.45 |
| Hassawi-2-S2    | 24.00 | 14.55 | 31.53 | 218.61 | 32.33 | 39.00 | 0.62 | 0.08 | 23.00 | 27.67  | 9.65  | 45.40  | 30.60  | 1.48 | 17.33 |
| Hssawi-3-S2     | 31.67 | 15.80 | 31.57 | 296.75 | 32.00 | 38.67 | 0.58 | 0.10 | 15.67 | 38.00  | 12.21 | 112.00 | 37.60  | 2.98 | 14.91 |
| Triple white-S2 | 27.33 | 11.60 | 30.80 | 388.84 | 32.00 | 37.33 | 0.33 | 0.05 | 11.33 | 39.33  | 10.71 | 82.60  | 16.70  | 4.95 | 7.65  |
| ILB-4347-S2     | 30.00 | 19.50 | 35.70 | 515.35 | 31.00 | 45.00 | 0.62 | 0.05 | 6.33  | 32.00  | 16.50 | 55.30  | 52.30  | 1.06 | 13.19 |
| Sakha-S2        | 26.67 | 18.02 | 30.00 | 469.77 | 31.67 | 45.00 | 0.78 | 0.06 | 18.00 | 48.33  | 12.47 | 59.90  | 46.00  | 1.30 | 14.95 |
| Misr-3-S2       | 41.67 | 15.71 | 29.77 | 492.10 | 31.67 | 43.00 | 0.68 | 0.07 | 16.00 | 9.67   | 10.67 | 42.00  | 31.20  | 1.35 | 16.01 |
| FLIP12501FB-S2  | 23.00 | 24.12 | 35.03 | 426.84 | 32.33 | 43.00 | 0.90 | 0.07 | 23.33 | 37.33  | 7.71  | 92.50  | 16.80  | 5.51 | 5.57  |
| Sakha-1-S2      | 27.33 | 19.38 | 29.50 | 329.73 | 32.67 | 43.00 | 0.62 | 0.03 | 9.67  | 25.00  | 5.96  | 121.00 | 32.80  | 3.69 | 8.58  |
| Gazira-S2       | 21.33 | 13.46 | 29.00 | 275.24 | 32.33 | 28.67 | 0.35 | 0.03 | 12.67 | 35.33  | 11.56 | 28.60  | 25.80  | 1.11 | 6.56  |
| FLIP12504FB-S2  | 22.00 | 15.20 | 33.17 | 351.39 | 31.67 | 43.00 | 0.60 | 0.05 | 11.00 | 48.33  | 5.40  | 119.00 | 52.20  | 2.28 | 6.55  |
| FLIP12505FB-S2  | 26.33 | 17.14 | 28.10 | 261.97 | 31.00 | 44.00 | 0.73 | 0.10 | 25.33 | 32.00  | 7.42  | 191.00 | 56.00  | 3.41 | 5.12  |
